# Supplementary material for: Plastid Phylogenomics and Plastome Evolution of Nandinoideae (Berberidaceae)
Source: Front Plant Sci. 2022 Jun 30;13:913011. doi: 10.3389/fpls.2022.913011 (PMC9302238; doi:10.3389/fpls.2022.913011)
Supplement: Supplementary file 4 [file Table_1.DOC]

***Table S1. List of genes in the 20 Nandinoideae plastomes newly sequenced in this study.***

| Gene category | Groups of genes | Name of genes | | | |
| --- | --- | --- | --- | --- | --- |
| Self-replication | Transfer RNA genes | *trn*A-UGCa*  *trnF-*GAA  *trnH-*GUG  *trnL-*CAAa  *trnN-*GUUa  *trnR-*UCU  *trnT-*GGU  *trnW-*CCA | *trn*C*-*GCA  *trnfM*-CAU  *trnI-*CAUa  *trnL-*UAA*  *trnP-*UGG  *trnS-*GCU  *trnT-*UGU  *trnY-*GUA | *trn*D*-*GUC  *trnG-*GCC*  *trnI-*GAUa*  *trnL-*UAG  *trnQ-*UUG  *trnS-*GGA  *trnV-*GACa | *trn*E*-*UUC  *trnG-*UCC  *trnK-*UUU*  *trnM-*CAU  *trnR-*ACGa  *trnS-*UGA  *trnV-*UAC* |
| Small subunit of ribosome | *rps*2  *rps8*  *rps*15 | *rps*3  *rps*11  *rps*16* | *rps*4  *rps*12a,b*  *rps*18 | *rps*7a  *rps*14  *rps*19a |
| Ribosomal RNA genes | *rrn*4.5a | *rrn*5a | *rrn*16a | *rrn*23a |
| Large subunit of ribosome | *rpl*2a  *rpl*22  *rpl*36 | *rpl*14  *rpl*23a | *rpl*16*  *rpl*32 | *rpl*20  *rpl*33 |
| RNA polymerase subunits | *rpo*A | *rpo*B | *rpo*C1* | *rpo*C2 |
| Photosynthesis | Subunits of photosystem I | *psa*A  *psa*J | *psa*B  *ycf*3** | *psa*C | *psa*I |
| Subunits of photosystem II | *psb*A  *psb*E  *psb*J  *psb*N | *psb*B  *psb*F  *psb*K  *psb*T | *psb*C  *psb*H  *psb*L  *psb*Z | *psb*D  *psb*I  *psb*M |
| Subunits of cytochrome | *pet*A  *pet*L | *pet*B*  *pet*N | *pet*D* | *pet*G |
| Subunits of ATP synthase | *atp*A  *atp*H | *atp*B  *atp*I | *atp*E | *atp*F* |
| Large subunit of Rubisco | *rbc*L |  |  |  |
| Subunits of NADH  Dehydrogenase | *ndh*A*  *ndh*E  *ndh*I | *ndh*Ba*  *ndh*F  *ndh*J | *ndh*C  *ndh*G  *ndh*K | *ndh*D  *ndh*H |
| Other genes | Translational initiation factor | *inf*A |  |  |  |
| Maturase | *mat*K |  |  |  |
| Envelope membrane protein | *cem*A |  |  |  |
| Subunit of acetyl-CoA | *acc*D |  |  |  |
| C-type cytochrome  synthesis gene | *ccs*A |  |  |  |
| Protease | *clp*P** |  |  |  |
| Unknown function | Conserved open reading frames | *ycf*1a (part) | *ycf*2a | *ycf*4 | *ycf15*a |

a Two gene copies in IRs; b gene divided into two independent transcription units; one and two asterisks indicate one- and two-intron containing genes, respectively.
