# Supplementary material for: Plastid Phylogenomics and Plastome Evolution of Nandinoideae (Berberidaceae)
Source: Front Plant Sci. 2022 Jun 30;13:913011. doi: 10.3389/fpls.2022.913011 (PMC9302238; doi:10.3389/fpls.2022.913011)
Supplement: Supplementary file 5 [file Table_2.XLS]

## Sheet: Sheet1
Table S2. Length of the 26 genes showing length polymorphism across the 26 Nandinoideae plastomes analyzed.
	matK	atpF	rpoC2	rpoC1	ndhK	atpB	rbcL	accD	psaJ	rpl20	rpoA	rps8	rps3	rpl22	rps19	ycf2	ycf15	ndhF	rpl32	ccsA	ndhD	ndhI	ndhA	rps15	ycf1
N. domestica (DQ923117)	1527	570	4134	2064	678	1497	1428	1494	135	360	1017	399	657	522	279	6900	234	2226	159	981	1560	543	1095	273	5607
C. robustum	1527	570	4122	2064	678	1497	1434	1500	135	354	1014	399	657	519	279	6933	243	2226	165	972	1560	552	1095	273	5619
C. robustum (MH423066)	1527	570	4122	2064	678	1497	1434	1500	135	354	1014	399	657	519	279	6933	243	2229	165	972	1560	552	1095	273	5646
C. thalictroides	1527	570	4122	2064	678	1497	1434	1500	135	354	1014	399	657	519	279	6939	243	2226	174	966	1530	543	1101	273	5532
L. armeniaca (MH423070)	1527	570	4107	2070	678	1497	1434	1500	135	354	1014	399	657	519	279	6927	141	2172	174	972	1560	543	1095	273	5562
L. ewersmannii	1533	570	4107	2070	678	1497	1434	1500	135	354	1014	399	657	519	246	6927	141	2151	159	972	1560	525	1095	273	5523
L. incerta (MH940295)	1527	570	4119	2070	678	1497	1434	1500	135	354	1014	399	657	525	279	6933	141	2151	165	972	1560	552	1095	273	5619
G. albertii (I)	1527	570	4110	2070	678	1497	1458	1503	141	354	1014	399	651	519	279	6933	243	2151	159	981	1560	543	1095	273	5607
G. albertii (II)	1527	570	4110	2070	678	1497	1458	1503	141	354	1014	399	651	519	279	6933	243	2151	159	972	1566	510	1095	273	4737
G. altaicum (I)	1527	570	4116	2070	678	1497	1458	1506	141	354	1014	399	651	519	279	6915	243	2154	159	972	1560	532	1095	273	4518
G. altaicum (II)	1527	570	4122	2070	678	1497	1458	1506	141	354	1014	399	651	519	279	6915	243	2154	159	972	1566	510	1095	273	4737
G. altaicum (III)	1527	570	4116	2070	678	1497	1458	1506	141	354	1014	399	651	519	279	6915	243	2154	159	981	1560	543	1095	273	5634
G. darwasicum (I)	1527	570	4110	2070	678	1497	1458	1500	135	354	1014	399	651	525	279	6909	243	2151	159	981	1560	543	1095	273	5634
G. darwasicum (II)	1527	570	4110	2070	678	1497	1458	1500	135	354	1014	399	651	525	279	6909	243	2151	174	972	1560	510	1095	273	5622
G. kiangnanens (II)	1527	561	4122	2076	684	1497	1458	1500	135	354	1014	399	651	519	279	6933	243	2157	174	972	1560	546	1095	273	5592
G. kiangnanens (MH298010)	1533	570	4110	2070	678	1497	1458	1506	135	354	1014	399	651	519	279	6933	243	2169	159	972	1560	525	1095	264	5601
G. microrrhynchum (I)	1533	570	4116	1314	678	1503	1458	1506	135	354	1014	399	651	519	279	6936	168	2166	159	972	1560	525	1095	264	5601
G. microrrhynchum (KM057373)	1533	570	4116	2076	678	1503	1458	1506	135	354	1014	399	651	519	279	6936	168	2166	159	972	1560	498	1095	273	5631
G. odessanum (I)	1527	570	4110	2070	678	1497	1458	1500	141	354	1014	405	651	519	279	6915	243	2163	159	972	1560	498	1095	273	5631
G. odessanum (II)	1527	570	4110	2070	678	1497	1458	1500	141	354	1014	405	651	519	279	6915	243	2154	159	972	1560	552	1095	273	5631
G. peloponnesiacum (I)	1527	570	4095	2070	678	1497	1458	1500	141	354	1014	405	651	528	279	6915	243	2166	159	972	1560	552	1095	273	5631
G. peloponnesiacum (II)	1527	570	4095	2070	678	1497	1458	1500	141	354	1014	405	651	528	279	6915	243	2166	159	972	1560	528	1101	273	5652
G. scipetarum (I)	1527	570	4116	2070	678	1497	1434	1500	141	354	1014	399	651	519	279	6933	243	2160	159	972	1560	528	1101	273	5652
G. scipetarum (II)	1527	570	4116	2070	678	1497	1434	1500	141	354	1014	399	651	519	279	6933	243	2160	159	972	1560	528	1095	273	5634
G. smirnovii	1527	570	4116	2070	678	1497	1458	1500	141	354	1014	399	651	519	279	6933	243	2160	159	981	1560	543	1095	273	5634
G. vitellinum	1527	570	4110	2070	678	1497	1458	1500	135	354	1014	399	651	525	279	6909	243	2151	174	972	1560	543	1095	273	5607
